# Supplementary material
Source: Springer Nature journal article supplement (https://www.springermedizin.de/resource/supplementary/12916_2012_765_MOESM7_ESM.pdf/9598702)

## A. Carmustine in brain homogenate

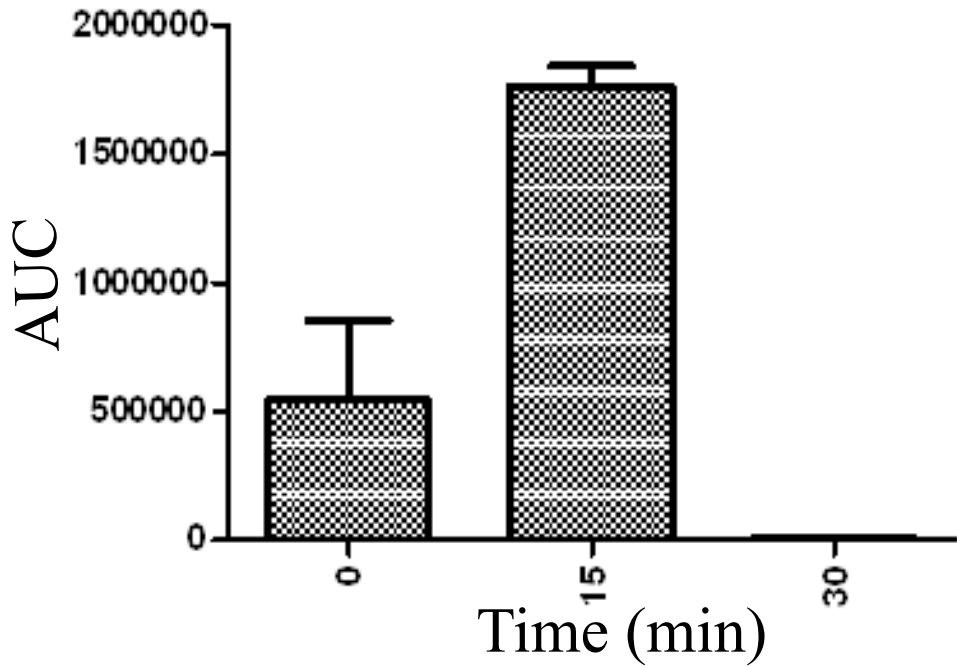

## B. Carmustine in blood

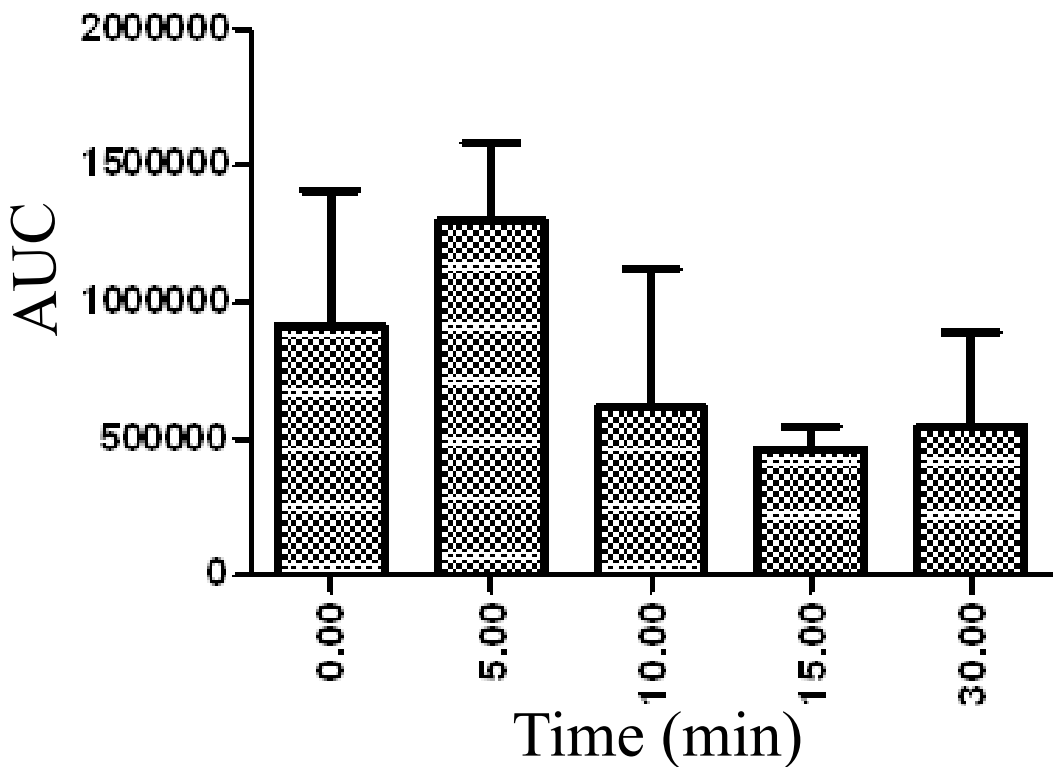

Supplement: MOESM7 [file 9598702]
